# Supplementary material for: Nitrogen Sources Reprogram Carbon and Nitrogen Metabolism to Promote Andrographolide Biosynthesis in Andrographis paniculata (Burm.f.) Nees Seedlings
Source: MDPI journal article supplement (doi:10.3390/ijms25073990), 2024-04-03
Supplement: s1 [file s1]

**Table S1** Primer sequences used for q-PCR in this study.

| Genes             | Forward (5'→3')       | Reverse (5'→3')      |
|-------------------|-----------------------|----------------------|
| <i>Actin</i>      | TAGAGAGTCCCCCGTATGCT  | CACAAGAATCCGACACGCAT |
| <i>AACT</i>       | GATGTTGTTGTGGCAGGTGG  | TCAGCACAATTCCCCATGCT |
| <i>HMGS</i>       | GATCTTGAGAAGGCGAGCCA  | CCGGCCAGAGAGCTACTTTT |
| <i>HMGR1</i>      | GGAAAATCTCTCGCCGGACT  | GAAGGAGTGGCCCTGCTATG |
| <i>MK</i>         | ATGTTGTGGGAGCAGAGAGTG | AAGCATCATGGCCACCAACT |
| <i>PMK</i>        | TCTGCTCCTGGGAAGGTTTTG | GGGTTCCTCGAGTCACTTCC |
| <i>MDD2</i>       | GCCTGGTCTTCTCATTGGCT  | CCCCTTGACGAATCCACCA  |
| <i>DXS</i>        | CAGGAAAACAGGCAAAGAGTA | TGGAGGAACGACGAGTAGAT |
| <i>DXR</i>        | CGCCCAAAAAGGGGTTTTGTT | TCTCTTGCCCGCACTGTATC |
| <i>MCT</i>        | AAGACCTCTCGTGTTGGCTG  | GCGAGTAGTAAGTCGTCGGG |
| <i>CMK</i>        | ACTCCGGCTTTTGACGTTCT  | AACTGAGGTGGATCGGGAGA |
| <i>MDS</i>        | GGGCTTCCAGACATTGGTCA  | CCCGAGCAACAGGCATAGAT |
| <i>HDS</i>        | CCAAGGCTGCAGAATGAGGA  | GAAACTCCGGGCAAGTGAGA |
| <i>HDR</i>        | GCTTGTGGTAGGTGGGTTCA  | TGCACCTGAAGTTATGCCGA |
| <i>GGPS</i>       | AGGTGGTGGACGACATCCTA  | CTCCCTCTTCAGCTGCTCTG |
| <i>CPS</i>        | CCATGGGCGACGGAGAAATA  | ACGCAGCTACGCATCCTAAT |
| <i>UGT73AU1</i>   | GGGGGAGGTGAACTTGGATG  | ACTCTTCCACCACGAGGGTA |
| <i>NIA2</i>       | TTACCGGATCGGAGAGCTGA  | CATCGTGTGAGAGCGAGGTT |
| <i>GS1</i>        | AGTTTCAAGTCGGCCCTAGC  | TTTGTGGCGAAGCGATAGGT |
| <i>GS2</i>        | TCCACTCTCCACTCCTCACC  | AGCCTCCGACCCAGATGTAT |
| <i>NDAH-GOGAT</i> | AGGAAGTCGAAGGTTCTGCG  | AATCCCAGTTTCTCCGCCAG |
| <i>Fd-GOGAT</i>   | CCCGGCGATCTCGTCAATTA  | CCAAGGTCGATGTGCTGAGT |
| <i>GDH</i>        | TGCTGATTTTAATGGCGCGG  | TCCGGGTCAGTAGGATGGTT |
| <i>GAD</i>        | TCGTGTCCAAGGATAACGGC  | GTGTATGCGGGGACAATCCA |
| <i>GABA-TP3</i>   | GGCGAGATTAGGGGAACAGG  | ACTCGCACCAACATCCCATT |
| <i>NAGK</i>       | GGACAAGGACAGGGCGATAA  | CCGCGCCTCATAAACCAATC |
| <i>ADC</i>        | GCCTCTCCCTACGCTTTTCTC | AGTGAAGTAAGAAGCGCCCC |

|             |                      |                       |
|-------------|----------------------|-----------------------|
| <i>glnD</i> | GCCGACGTAATGCGAACAAT | CCGATGGAACGACTGGAGTT  |
| <i>ACO</i>  | GCTGTCCAGTCGGAGATCAG | GTTGGAGACGGGGAGATGAC  |
| <i>EIN3</i> | AGGGTCTTCAATCAGTGGCG | GCCCTTCTGGCTCACATTCT  |
| <i>AOAT</i> | GACCGAGATGAACGGGCAAT | AGCGAAGTGTTGAGCGAGAA  |
| <i>AODA</i> | CCTGGAGGTGGCATCAATCA | CTGGCGTTCTCCTCTGGAAG  |
| <i>OAT</i>  | ACTGCACTTACAGGCAACAC | AAAGTGGACTGGGACGTTCTG |
| <i>AGDI</i> | ACCGGAACCCCGATTTAACC | ACAACGCTCGTATTGTGGGT  |
| <i>CuAO</i> | GTGGAGATGGTTGTGCCGTA | AGAAAGCACGATCGAGGCAA  |

---

**Table S2** Parameters of *A-Ci* curve.  $V_{\text{cmax}}$ ,  $J_{\text{max}}$  and  $TPU$  were calculated by the FvCB model [74]. Data were represented by means $\pm$ SD ( $n=4$ ). Different letters in the same column indicates significant difference at  $P < 0.05$  level according to one-way ANOVA combined with Duncan's multiple range method. NN, nitrate nitrogen; AN, ammonium nitrogen; UN, urea nitrogen; GN, glycine nitrogen.

| Treatment | $V_{\text{cmax}}$<br>$\mu\text{mol}\cdot\text{m}^{-2}\cdot\text{s}^{-1}$ | $J_{\text{max}}$<br>$\mu\text{mol}\cdot\text{m}^{-2}\cdot\text{s}^{-1}$ | $TPU$<br>$\mu\text{mol}\cdot\text{m}^{-2}\cdot\text{s}^{-1}$ |
|-----------|--------------------------------------------------------------------------|-------------------------------------------------------------------------|--------------------------------------------------------------|
| NN        | 47.82 $\pm$ 0.35 ab                                                      | 45.85 $\pm$ 1.08 a                                                      | 9.00 $\pm$ 0.07 ab                                           |
| AN        | 52.66 $\pm$ 1.61 a                                                       | 51.00 $\pm$ 2.37 a                                                      | 9.78 $\pm$ 0.41 a                                            |
| UN        | 50.09 $\pm$ 2.04 ab                                                      | 49.00 $\pm$ 2.00 a                                                      | 9.29 $\pm$ 0.35 ab                                           |
| GN        | 46.66 $\pm$ 0.94 b                                                       | 43.76 $\pm$ 1.14 a                                                      | 8.53 $\pm$ 0.14 b                                            |

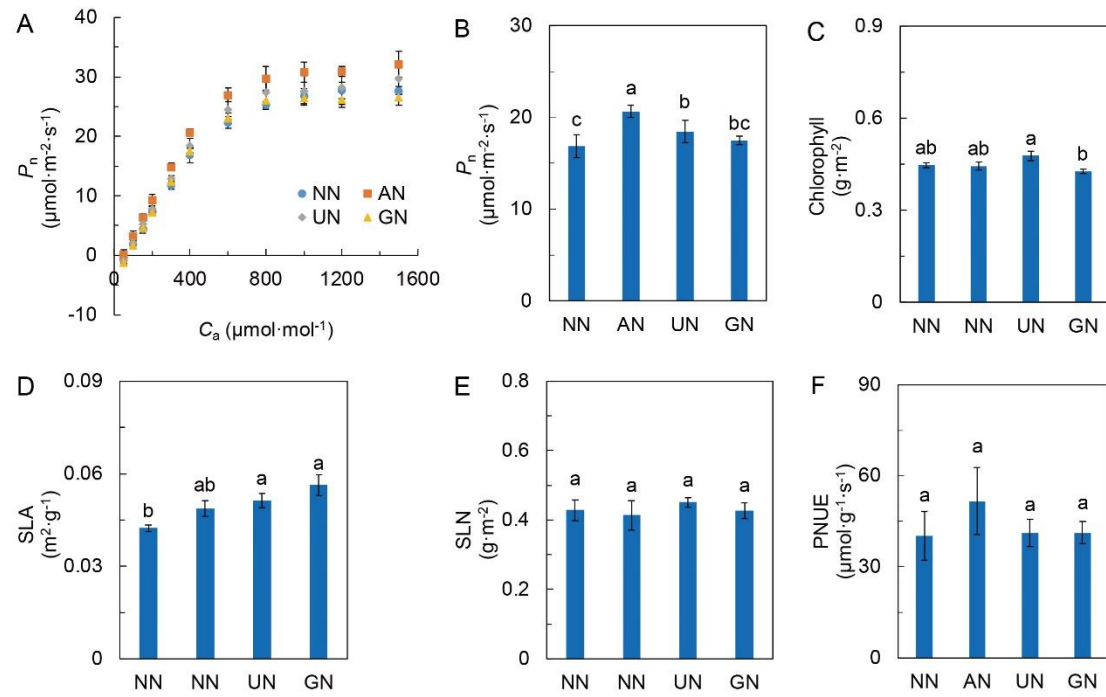

**Fig.S1** Photosynthetic  $\text{CO}_2$  response curve, chlorophyll, SLA and SLN in response to N forms in *A. paniculata*. **(A)** Photosynthetic  $A$ - $C_a$  curve; **(B)** Photosynthetic rate at 400  $\mu\text{mol}\cdot\text{mol}^{-1}$   $C_a$  (ambient  $\text{CO}_2$  concentration); **(C)** Chlorophyll content based on leaf are; **(D)** Specific leaf area; **(E)** Specific leaf N content; **(F)** Photosynthetic N use efficiency. Data were represented by means $\pm$ SD ( $n=4$ ). Different letters in the same column indicates significant difference at  $P < 0.05$  level according to one-way ANOVA combined with Duncan's multiple range method. NN, nitrate nitrogen; AN, ammonium nitrogen; UN, urea nitrogen; GN, glycine nitrogen.

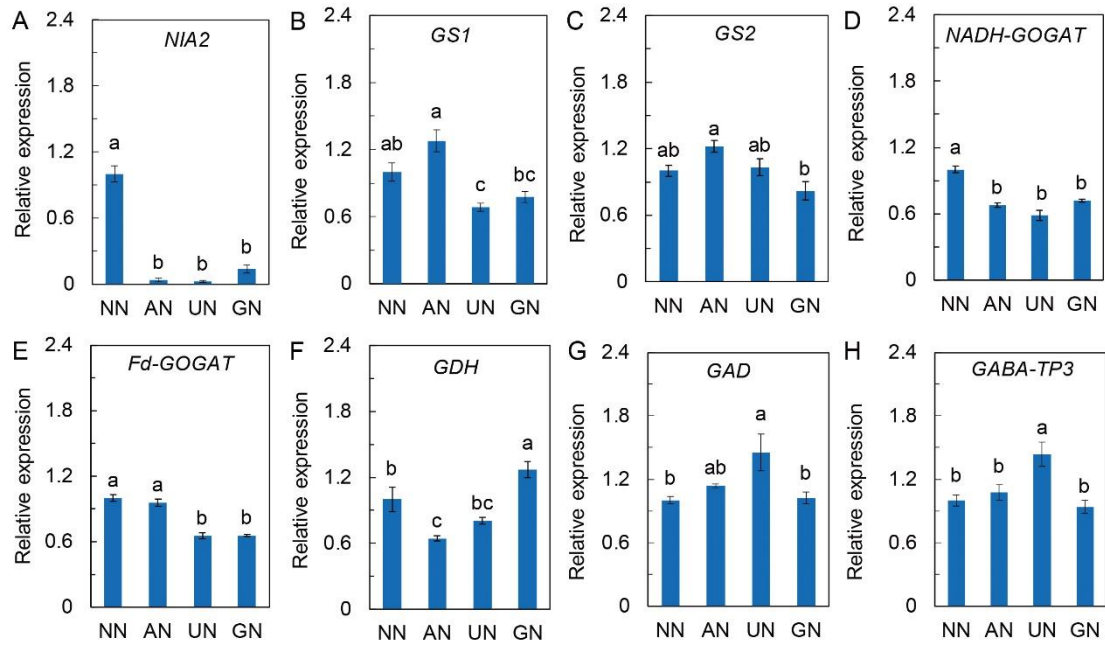

**Fig.S2** Expression of N metabolic genes in response to N forms. Data were represented by means $\pm$ SD ( $n=4$ ). Different letters in the same column indicates significant difference at  $P < 0.05$  level according to one-way ANOVA combined with Duncan's multiple range method. NN, nitrate nitrogen; AN, ammonium nitrogen; UN, urea nitrogen; GN, glycine nitrogen.

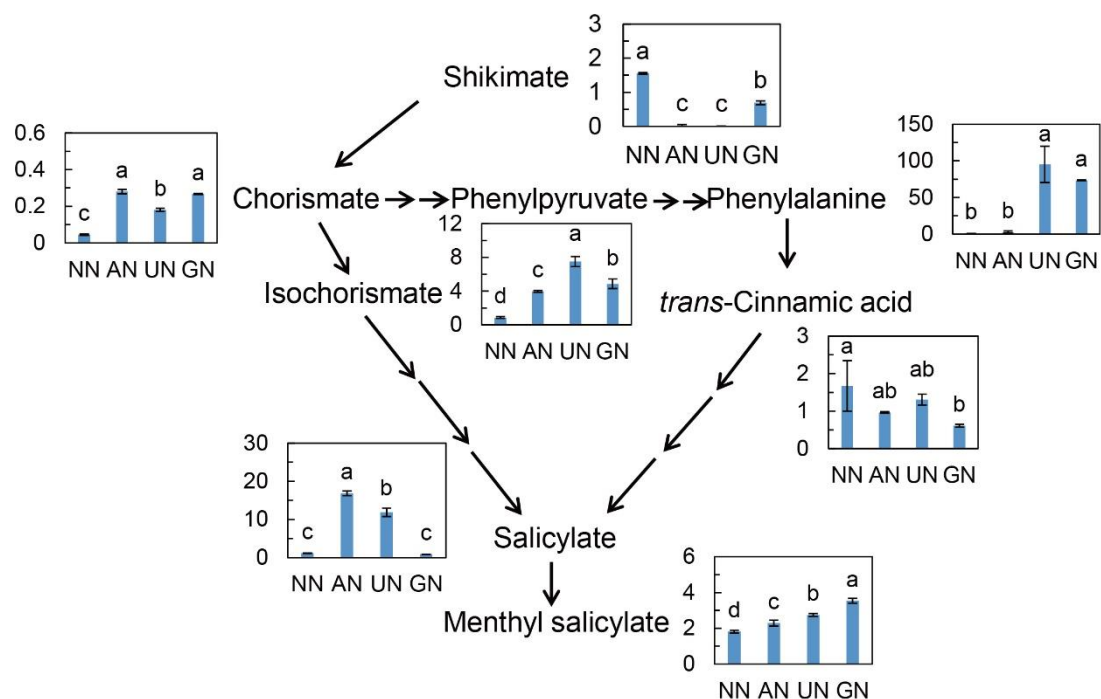

**Fig.S3** Salicylic acid synthetic pathway in response to N forms. Data were represented by means $\pm$ SD ( $n=4$ ). Different letters in the same column indicates significant difference at  $P < 0.05$  level according to one-way ANOVA combined with Duncan's multiple range method. NN, nitrate nitrogen; AN, ammonium nitrogen; UN, urea nitrogen; GN, glycine nitrogen.

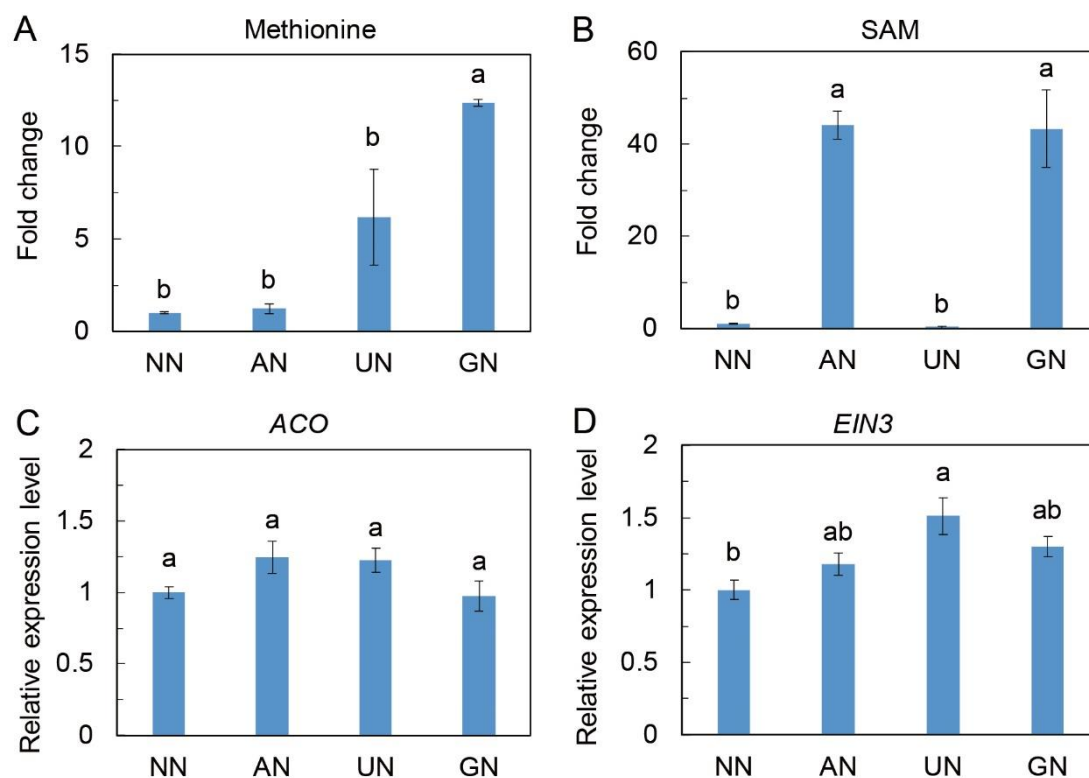

**Fig.S4** Methionine and S- S-adenosylmethionine (SAM) levels and expression of *ACO* and *EIN3* in response to N forms. Data were represented by means  $\pm$  SE ( $n=4$ ). Different letters in the same column indicates significant difference at  $P < 0.05$  level according to one-way ANOVA combined with Duncan's new complex range method. NN, nitrate nitrogen; AN, ammonium nitrogen; UN, urea nitrogen; GN, glycine nitrogen.
